# Supplementary material for: Intact Transition Epitope Mapping—Force Interferences by Variable Extensions (ITEM-FIVE)
Source: MDPI journal article supplement (doi:10.3390/biom14040454), 2024-04-08
Supplement: s1 [file s1]

# **Intact Transition Epitope Mapping – Force Interferences by Variable Extensions (ITEM-FIVE)**

Cornelia Koy <sup>1)</sup>, Claudia Röwer <sup>1)</sup>, Hans-Jürgen Thiesen <sup>2)</sup>, Andrei Neamtu <sup>3)</sup>, Michael O. Glocker <sup>1)</sup>

1) Proteome Center Rostock, Medical Faculty and Natural Science Faculty, University of Rostock,  
Schillingallee 69, 18057 Rostock, Germany

2) Institute for Immunology, Medical Faculty and Natural Science Faculty, University of Rostock,  
Schillingallee 69, 18057 Rostock, Germany

3) TRANSCEND Centre – Regional Institute of Oncology (IRO) Iasi, Str. General Henri Mathias  
Berthelot, Nr. 2–4 Iași, România; Department of Physiology, Gr. T. Popa University of Medicine  
and Pharmacy of Iasi, Str. Universitatii nr. 16, Iasi Jud., Romania

## **Supplement**

**Supplemental Table S1:** Ion intensities, charge states, and m/z values for the F-F-F homotrimer at various collision cell voltage difference settings. **1st determination** (15072021\_Foldon\_Pep1\_MSMS\_1849\_02.raw)

| ion   | z  | m/z  | 0V    | 2V    | 4V     | 6V     | 8V     | 10V    | 12V    | 15V    | 18V   | 22V    | 26V    | 30V    | 35V    | 40V    | 45V    | 50V    | 55V |
|-------|----|------|-------|-------|--------|--------|--------|--------|--------|--------|-------|--------|--------|--------|--------|--------|--------|--------|-----|
| F-F-F | 5+ | 1848 | 92850 | 65322 | 111678 | 125873 | 132104 | 128171 | 139805 | 123661 | 77073 | 14291  | 378    | 164    | 44     | 42     | 41     | 9      | /   |
| F-F   | 3+ | 2053 | 204   | 196   | 182    | 321    | 461    | 635    | 1810   | 7754   | 22584 | 54422  | 52233  | 59050  | 29306  | 5965   | 1516   | 198    | /   |
| F     | 2+ | 1540 | 490   | 498   | 525    | 486    | 1427   | 3054   | 7721   | 31087  | 95942 | 238696 | 258080 | 357819 | 421986 | 441875 | 399284 | 585802 | /   |

**2nd determination** (20072021\_Foldon\_FBTN\_P1\_MSMS\_1848.raw)

| ion   | z  | m/z  | 0V | 2V | 4V     | 6V | 8V     | 10V | 12V    | 15V | 18V    | 22V    | 26V    | 30V | 35V    | 40V | 45V    | 50V | 55V    |
|-------|----|------|----|----|--------|----|--------|-----|--------|-----|--------|--------|--------|-----|--------|-----|--------|-----|--------|
| F-F-F | 5+ | 1848 | /  | /  | 160145 | /  | 228438 | /   | 223072 | /   | 110400 | 724    | 304    | /   | 141    | /   | 115    | /   | 100    |
| F-F   | 3+ | 2053 | /  | /  | 334    | /  | 1391   | /   | 5149   | /   | 43963  | 90997  | 64632  | /   | 3088   | /   | 80     | /   | 130    |
| F     | 2+ | 1540 | /  | /  | 501    | /  | 4032   | /   | 20916  | /   | 172703 | 410203 | 577840 | /   | 708641 | /   | 682144 | /   | 376570 |

**Supplemental Table S2:** Ion intensities, charge states, and m/z values for the F-F-bF heterotrimer at various collision cell voltage difference settings. **1st determination** (19072021\_Foldon\_P1BTN\_MSMS\_1952\_01.raw)

| ion    | z  | m/z  | 0V    | 2V    | 4V    | 6V    | 8V    | 10V   | 12V   | 15V   | 18V   | 22V   | 26V   | 30V   | 35V   | 40V   | 45V   | 50V   | 55V   |
|--------|----|------|-------|-------|-------|-------|-------|-------|-------|-------|-------|-------|-------|-------|-------|-------|-------|-------|-------|
| F-F-bF | 5+ | 1952 | 21377 | 34580 | 38452 | 31003 | 39316 | 39255 | 34383 | 30702 | 9567  | 1091  | 58    | 41    | 39    | 26    | 20    | 22    | 15    |
| F-F    | 3+ | 2054 | 70    | 115   | 119   | 189   | 109   | 256   | 490   | 2123  | 3573  | 6544  | 6184  | 6523  | 2699  | 810   | 252   | 56    | 0     |
| bF     | 2+ | 1798 | 0     | 218   | 195   | 271   | 259   | 486   | 1350  | 4737  | 8711  | 13307 | 12085 | 19956 | 20032 | 27843 | 29396 | 26371 | 21811 |
| F-bF   | 3+ | 2225 | 0     | 0     | 78    | 77    | 87    | 303   | 692   | 1872  | 4091  | 5609  | 5480  | 5009  | 2794  | 978   | 119   | 0     | 0     |
| F      | 2+ | 1541 | 102   | 149   | 251   | 256   | 601   | 1242  | 3833  | 14618 | 31826 | 47075 | 43997 | 65564 | 63684 | 78382 | 79474 | 81083 | 65318 |

**2nd determination** (20072021\_Foldon\_FFBTN\_P1\_MSMS\_1951.raw)

| ion    | z  | m/z  | 0V | 2V | 4V     | 6V | 8V     | 10V | 12V    | 15V | 18V    | 22V | 26V    | 30V | 35V    | 40V | 45V    | 50V | 55V    |
|--------|----|------|----|----|--------|----|--------|-----|--------|-----|--------|-----|--------|-----|--------|-----|--------|-----|--------|
| F-F-bF | 5+ | 1952 | /  | /  | 408760 | /  | 384719 | /   | 403319 | /   | 319882 | /   | 16584  | /   | 266    | /   | 99     | /   | 95     |
| F-F    | 3+ | 2054 | /  | /  | 398    | /  | 522    | /   | 1489   | /   | 15830  | /   | 91527  | /   | 74599  | /   | 11741  | /   | 95     |
| bF     | 2+ | 1798 | /  | /  | 537    | /  | 1097   | /   | 3474   | /   | 37300  | /   | 234565 | /   | 265857 | /   | 440975 | /   | 477642 |
| F-bF   | 3+ | 2225 | /  | /  | 244    | /  | 562    | /   | 1666   | /   | 15678  | /   | 86344  | /   | 76233  | /   | 16104  | /   | 186    |
| F      | 2+ | 1541 | /  | /  | 772    | /  | 1644   | /   | 8535   | /   | 100301 | /   | 609293 | /   | 665798 | /   | 913634 | /   | 953036 |

**Supplemental Table S3:** Ion intensities, charge states, and m/z values for the F-bF-bF heterotrimer at various collision cell voltage difference settings. **1st determination** (20072021\_Foldon\_FBTN\_P1\_MSMS\_2055.raw)

| ion            | z         | m/z  | 0V | 2V    | 4V | 6V | 8V    | 10V   | 12V   | 15V   | 18V   | 22V   | 26V   | 30V    | 35V    | 40V    | 45V    | 50V    | 55V    |
|----------------|-----------|------|----|-------|----|----|-------|-------|-------|-------|-------|-------|-------|--------|--------|--------|--------|--------|--------|
| <b>F-bF-bF</b> | <b>5+</b> | 2054 | /  | 89313 | /  | /  | 84556 | 79738 | 75526 | 72486 | 65392 | 60604 | 51672 | 5215   | 2760   | 860    | 499    | 126    | 235    |
| <b>bF-bF</b>   | <b>3+</b> | 2397 | /  | 58    | /  | /  | 177   | 194   | 388   | 1050  | 2173  | 9035  | 18432 | 24319  | 25440  | 19185  | 18473  | 6062   | 1361   |
| <b>F</b>       | <b>2+</b> | 1541 | /  | 193   | /  | /  | 504   | 777   | 1308  | 2775  | 8512  | 26937 | 66681 | 90641  | 111032 | 105951 | 161977 | 132230 | 156167 |
| <b>F-bF</b>    | <b>3+</b> | 2225 | /  | 175   | /  | /  | 353   | 416   | 1094  | 2614  | 8423  | 35251 | 79991 | 98470  | 99147  | 62855  | 40741  | 7406   | 827    |
| <b>bF</b>      | <b>2+</b> | 1798 | /  | 201   | /  | /  | 350   | 711   | 1292  | 3444  | 9399  | 36182 | 91335 | 118962 | 139491 | 135419 | 226755 | 213665 | 252786 |

**Supplemental Table S4:** Ion intensities, charge states, and m/z values for the bF-bF-bF homotrimer at various collision cell voltage difference settings. **1st determination** (15072021\_Foldon\_BTN\_MSMS\_2159\_01.raw)

| ion             | z         | m/z  | 0V     | 2V      | 4V      | 6V      | 8V      | 10V     | 12V     | 15V     | 18V     | 22V    | 26V    | 30V     | 35V     | 40V     | 45V     | 50V     | 55V     |
|-----------------|-----------|------|--------|---------|---------|---------|---------|---------|---------|---------|---------|--------|--------|---------|---------|---------|---------|---------|---------|
| <b>bF-bF-bF</b> | <b>5+</b> | 2158 | 534373 | 1411979 | 1716272 | 2454268 | 2253328 | 2086819 | 2219942 | 2401570 | 1862383 | 809933 | 110522 | 7599    | 999     | 222     | 104     | 59      | 29      |
| <b>bF-bF</b>    | <b>3+</b> | 2397 | 85     | 226     | 413     | 653     | 958     | 1936    | 2506    | 5583    | 15724   | 67215  | 697159 | 1186044 | 302551  | 282999  | 160255  | 54076   | 9182    |
| <b>bF</b>       | <b>2+</b> | 1798 | 0      | 0       | 1074    | 1776    | 2702    | 6517    | 7694    | 22604   | 74606   | 347946 | 999319 | 1711191 | 2170672 | 2720714 | 3012266 | 3512346 | 3577762 |

**2nd determination** (19072021\_Foldon\_P1FBTN\_MSMS\_2158.raw)

| ion             | z         | m/z  | 0V    | 2V    | 4V    | 6V    | 8V    | 10V   | 12V   | 15V   | 18V   | 22V   | 26V   | 30V   | 35V   | 40V   | 45V   | 50V   | 55V   |
|-----------------|-----------|------|-------|-------|-------|-------|-------|-------|-------|-------|-------|-------|-------|-------|-------|-------|-------|-------|-------|
| <b>bF-bF-bF</b> | <b>5+</b> | 2158 | 19333 | 58466 | 58057 | 55380 | 62102 | 74214 | 55149 | 52108 | 30501 | 6239  | 479   | 260   | 167   | 124   | 107   | 112   | 32    |
| <b>bF-bF</b>    | <b>3+</b> | 2397 | 0     | 0     | 0     | 0     | 70    | 100   | 179   | 605   | 3766  | 6776  | 5675  | 5214  | 4317  | 2333  | 139   | 140   | 18    |
| <b>bF</b>       | <b>2+</b> | 1798 | 87    | 78    | 133   | 305   | 367   | 580   | 897   | 3728  | 20079 | 38907 | 32294 | 31186 | 39621 | 52623 | 61767 | 64951 | 57852 |

**Supplemental Table S5:** Biotin contacts with foldon monomer units in T4Ff trimers <sup>a)</sup>.

|               | <b>F <sup>b)</sup></b> | <b>bF-bF-bF</b> | <b>F-bF-bF</b> | <b>F-F-bF</b> | <b>F-F-F</b> |
|---------------|------------------------|-----------------|----------------|---------------|--------------|
| in touch with | +1                     | 41.82           | 63.17          | 66.10         | n.a.         |
| in touch with | 0                      | 2.53            | 2.29           | 3.12          | n.a.         |
| in touch with | -1                     | 2.26            | 1.00           | 0.67          | n.a.         |
| not in touch  | /                      | 62.97           | 40.12          | 37.69         | n.a.         |

  

|               | <b>F <sup>b)</sup></b> | <b>bF-bF-bF</b> | <b>F-bF-bF</b> | <b>F-F-bF</b> | <b>F-F-F</b> |
|---------------|------------------------|-----------------|----------------|---------------|--------------|
| in touch with | +1                     | 68.47           | 78.47          | n.a.          | n.a.         |
| in touch with | 0                      | 5.91            | 6.78           | n.a.          | n.a.         |
| in touch with | -1                     | 0.50            | 0.23           | n.a.          | n.a.         |
| not in touch  | /                      | 37.94           | 28.54          | n.a.          | n.a.         |

  

|               | <b>F <sup>b)</sup></b> | <b>bF-bF-bF</b> | <b>F-bF-bF</b> | <b>F-F-bF</b> | <b>F-F-F</b> |
|---------------|------------------------|-----------------|----------------|---------------|--------------|
| in touch with | +1                     | 53.24           | n.a.           | n.a.          | n.a.         |
| in touch with | 0                      | 1.90            | n.a.           | n.a.          | n.a.         |
| in touch with | -1                     | 0.70            | n.a.           | n.a.          | n.a.         |
| not in touch  | /                      | 49.36           | n.a.           | n.a.          | n.a.         |

a) numbers in %. Color code as in figure 5.

b) foldon unit: 0: foldon unit to which the biotin moiety is bound to; +1: clock-wise oriented foldon unit to the one to which the biotin moiety is bound to; -1: counter-clock-wise oriented foldon unit to the one to which the biotin moiety is bound to

n.a. not applicable

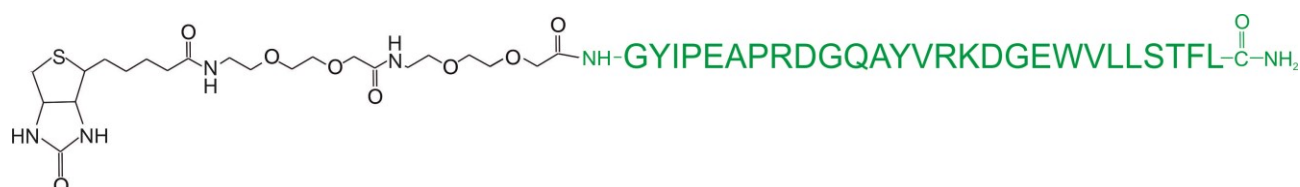

**Supplemental Figure S1:** Structure scheme of biotin anchored to T4Ff. Biotin is covalently attached to T4Ff's N-terminal amino group via two 8-amino-3,6-dioxaoctanoic acid spacers. T4Ff's amino acid sequence (green) is shown in single letter code and its C-terminal amido group is indicated.

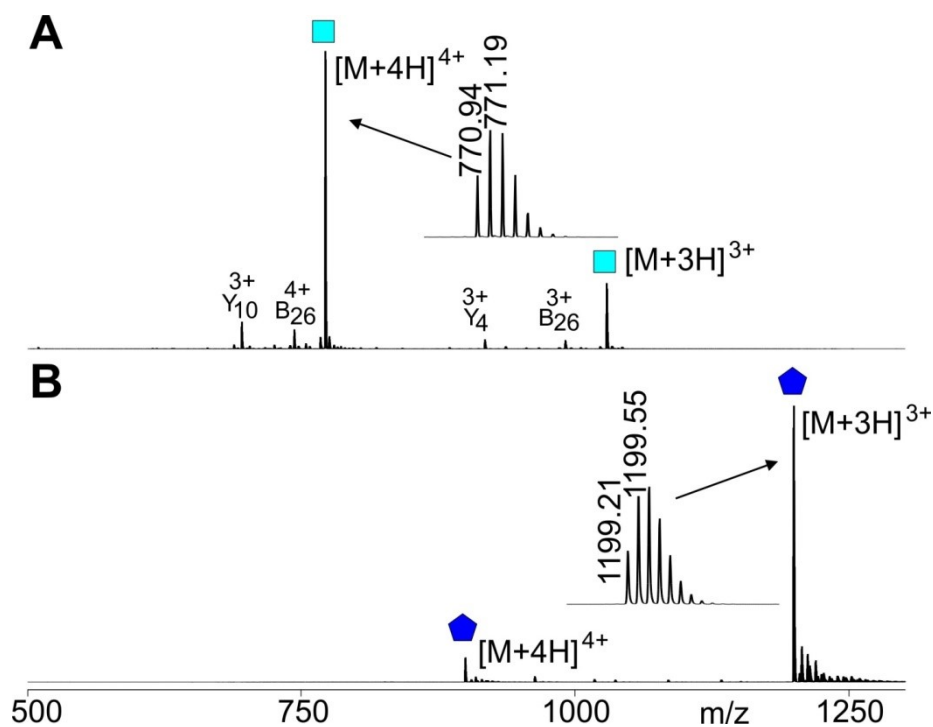

**Supplemental Figure S2:** Offline nanoESI mass spectra of foldon monomers. **A:** T4Ff (■). **B:** Biotinylated T4Ff (■). Protonation states of multiply charged ion signals are given. Zooms show isotope patterns of pseudo-molecular ions and  $m/z$  values are given for mono-isotopic ion signals and ion signals with peptides which contain one  $^{13}\text{C}$  atom. Fragment ions are labeled. For symbol assignment see Table 1. Solvent: 10% acetic acid / methanol (9:1 v/v), pH 3.

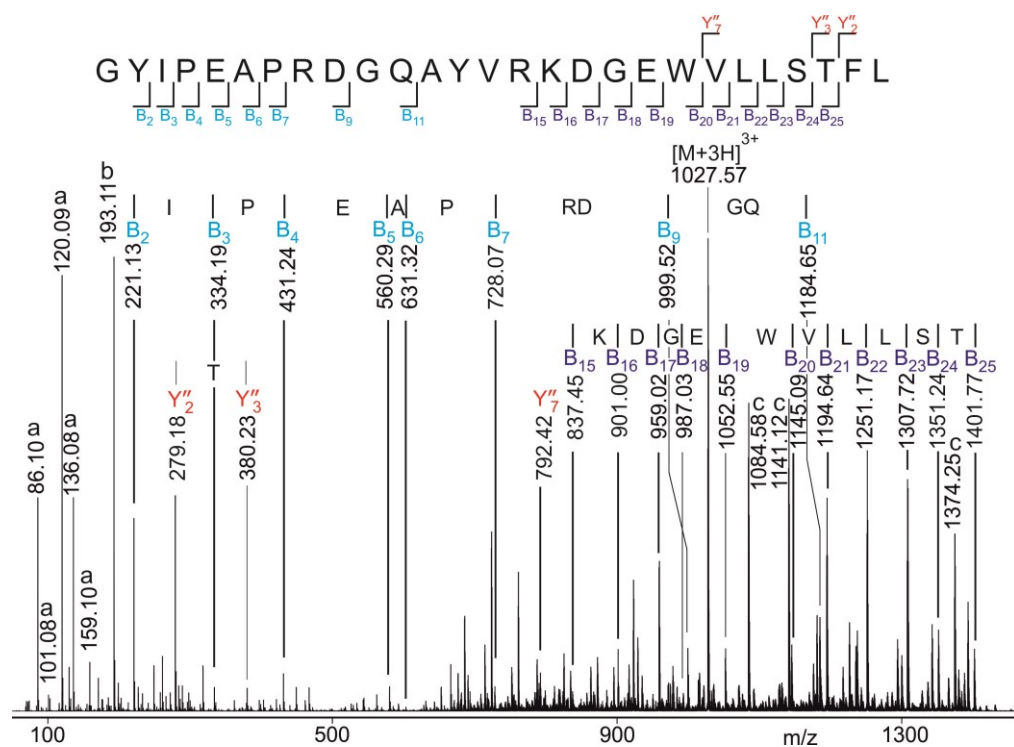

**Supplemental Figure S3:** Offline nanoESI tandem mass spectrum of foldon monomer. The triply-protonated pseudo-molecular ion of T4Ff served as parent ion. B and  $Y'$  ion signals are labeled and  $m/z$  values of selected ion signals are given. Amino acid sequence is shown in single letter code. Solvent: 10% acetic acid / methanol (9:1 v/v), pH 3.

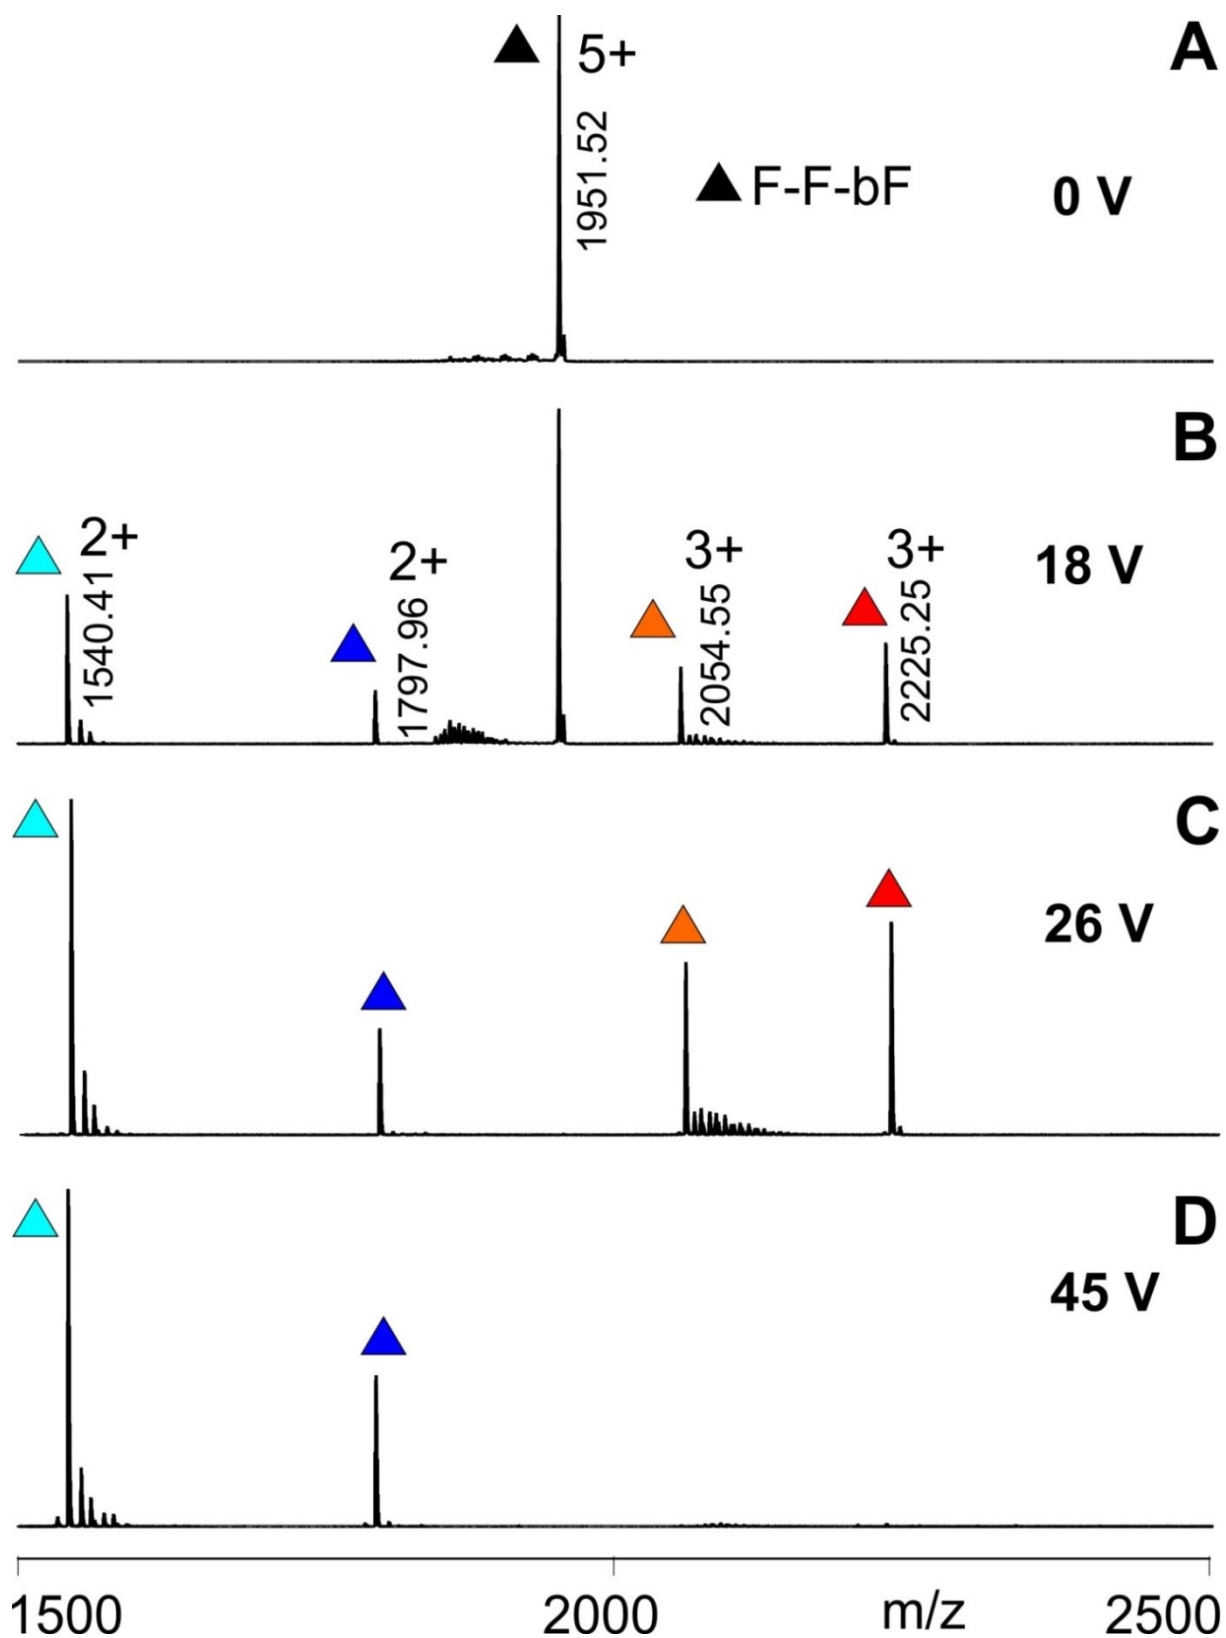

**Supplemental Figure S4:** ITEM-TWO analysis of quintuply protonated singly biotinylated T4Ff hetero-trimer (F-F-bF). Different collision cell voltage differences ( $\Delta CV$ ) were applied. **A:** 0 V. **B:** 18 V. **C:** 26 V. **D:** 45 V. Charge states and  $m/z$  values are given for the singly biotinylated T4Ff trimer (▲) (educts) as well as for the released T4Ff dimers (▲ and ▲) and monomers (▲ and ▲) (products). T4Ff concentration was 0.21  $\mu\text{g}/\mu\text{l}$ . For intensities and  $m/z$  values of ion signals see Supplemental Table 2. For symbol assignments see Table 1 and Figure 2.

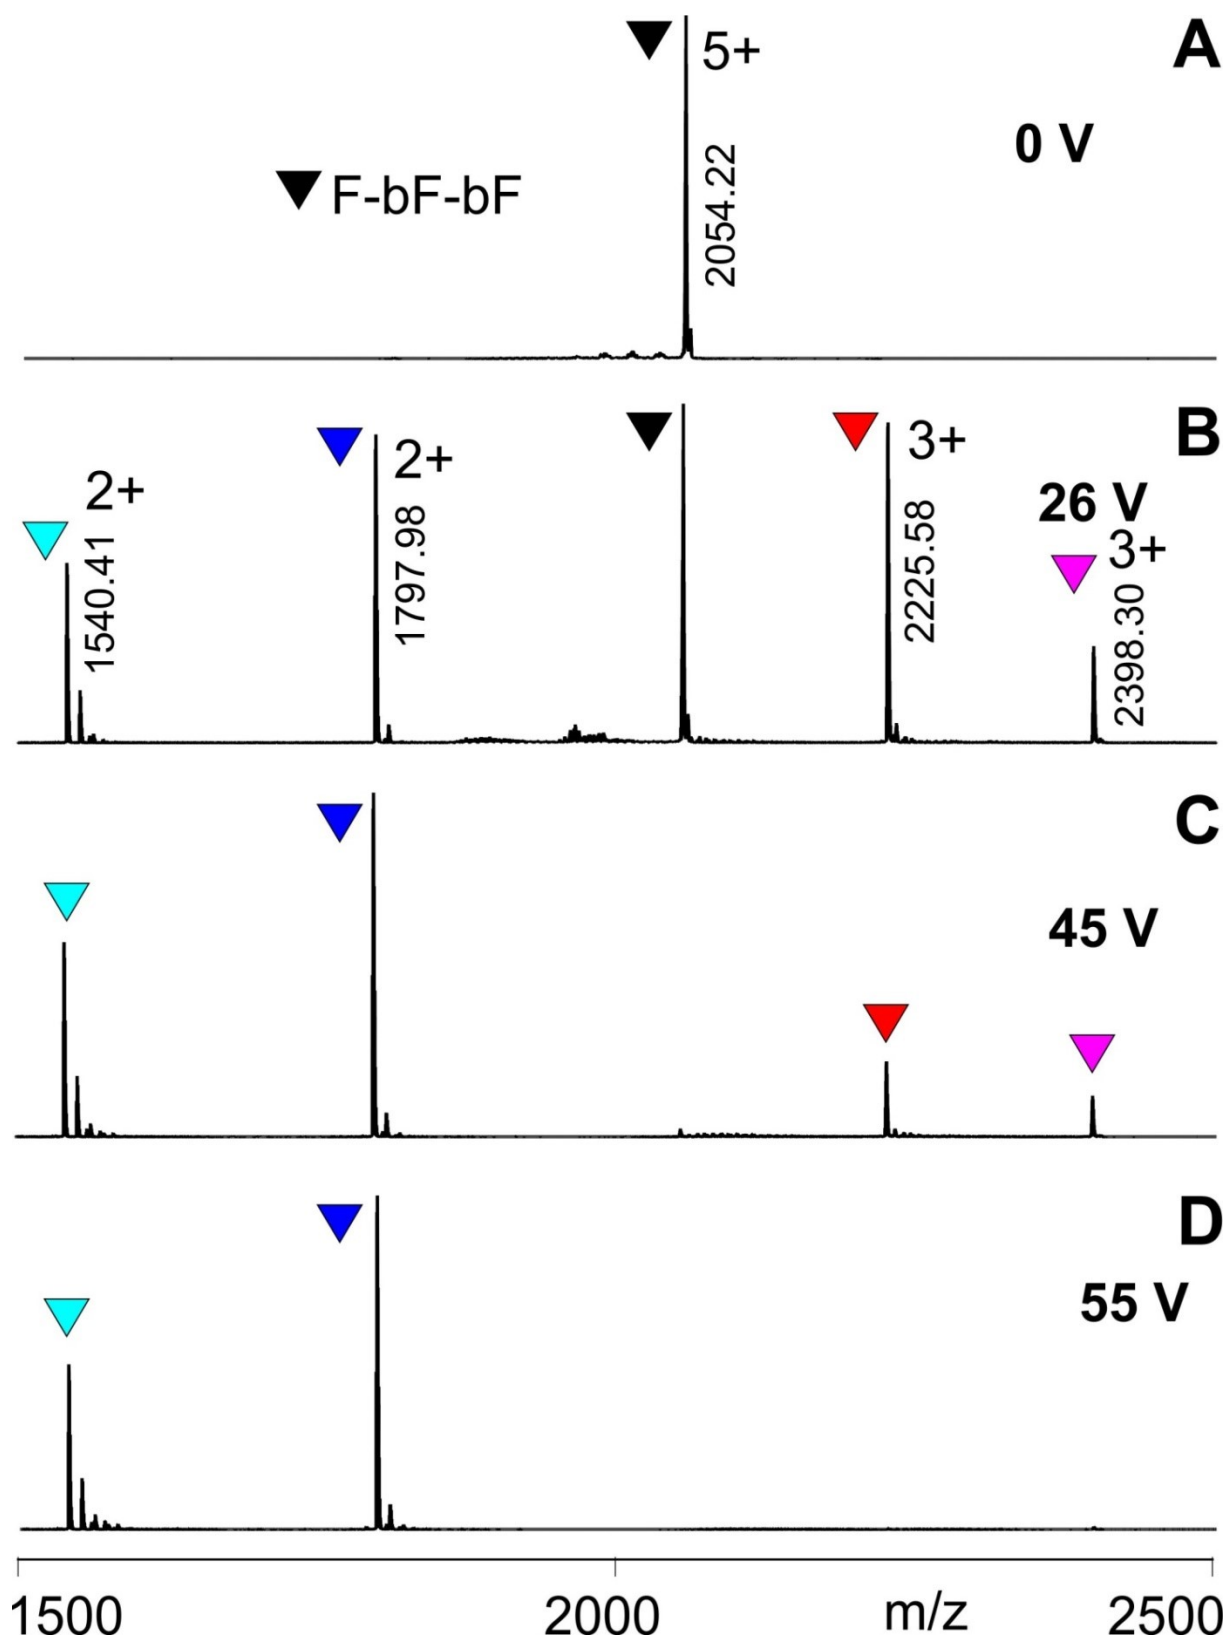

**Supplemental Figure S5:** ITEM-TWO analysis of quintuply protonated doubly biotinylated T4Ff hetero-trimer (F-bF-bF). Different collision cell voltage differences ( $\Delta CV$ ) were applied. **A:** 0 V. **B:** 26 V. **C:** 45 V. **D:** 55 V. Charge states and  $m/z$  values are given for the doubly biotinylated T4Ff trimers (▼) (educts) as well as for the released T4Ff dimers (▼ and ▼) and monomers (▼ and ▼) (products). T4Ff concentration was 0.21  $\mu\text{g}/\mu\text{l}$ . For intensities and  $m/z$  values of ion signals see Supplemental Table 3. For symbol assignment see Table 1 and Figure 2.

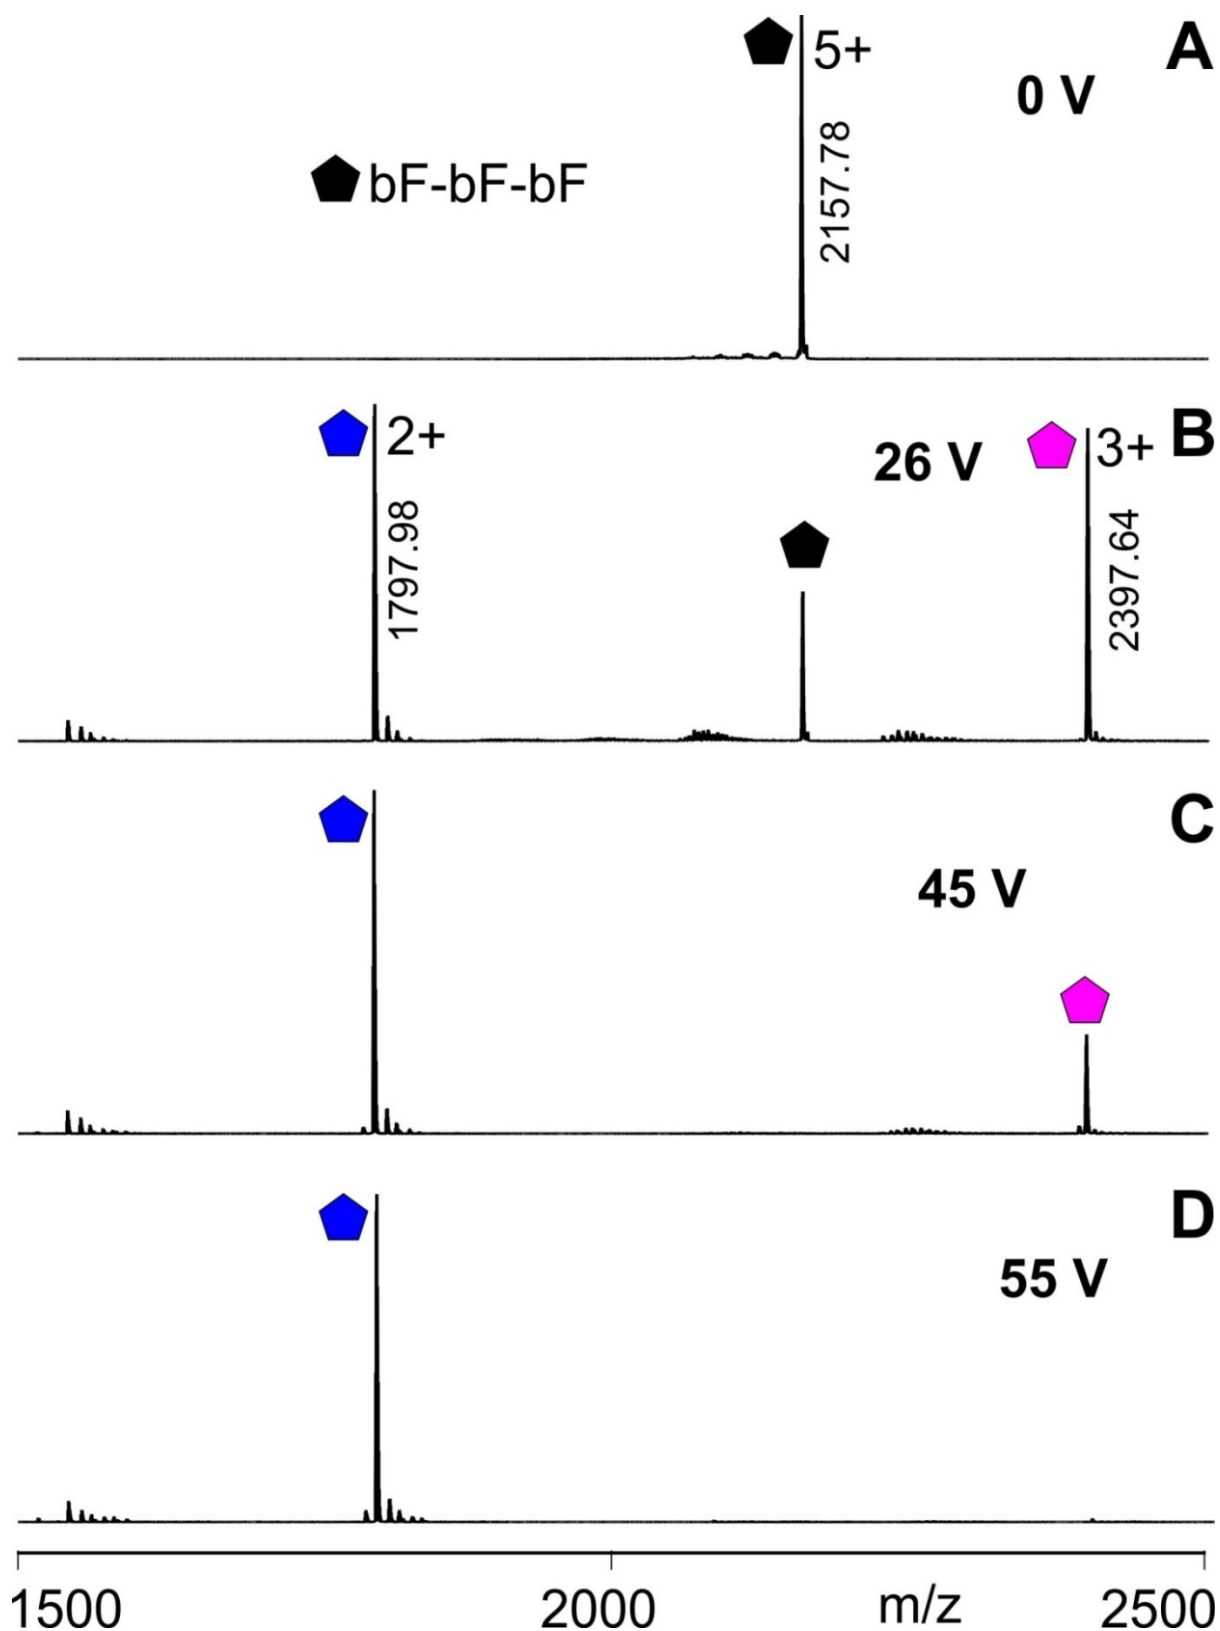

**Supplemental Figure S6:** ITEM-TWO analysis of quintuply protonated biotinylated T4Ff homo-trimers. Different collision cell voltage differences ( $\Delta CV$ ) were applied. **A:** 0 V. **B:** 26 V. **C:** 45 V. **D:** 55 V. Charge states and  $m/z$  values are given for the biotinylated T4Ff trimers (black pentagon) (educts) as well as for the released biotinylated T4Ff dimers (pink pentagon) and biotinylated monomers (blue pentagon) (products). Biotinylated T4Ff concentration was 0.21  $\mu\text{g}/\mu\text{l}$ . For intensities and  $m/z$  values of ion signals see Supplemental Table 4. For symbol assignment see Table 1 and Figure 2.



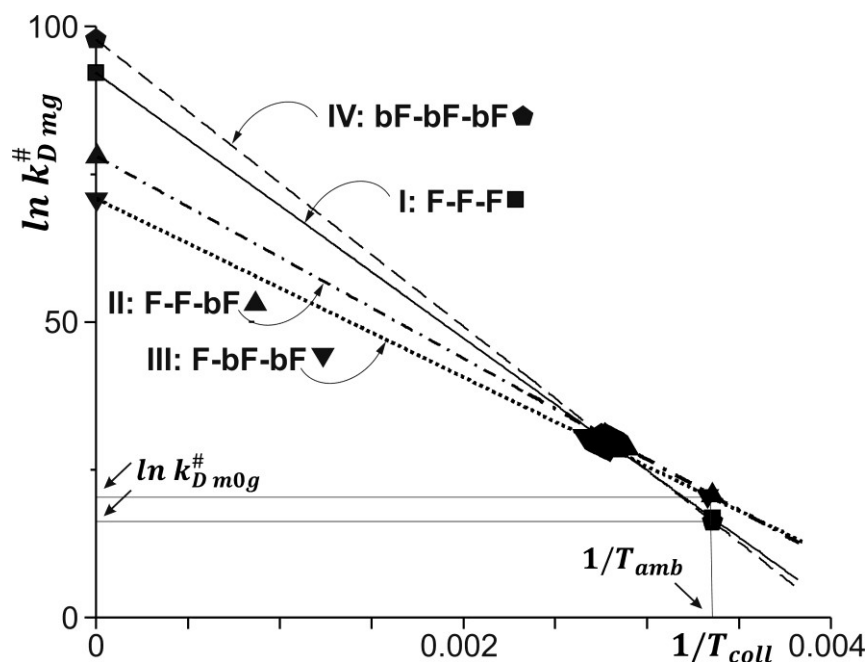

**Supplemental Figure S7:** Arrhenius plot for (biotinylated) T4Ff trimer dissociation reactions in the gas phase. T4Ff homo-trimer: ■; singly biotinylated T4Ff hetero-trimer: ▲; doubly biotinylated T4Ff hetero-trimer: ▼; biotinylated T4Ff homo-trimer: ◆. Each data point (thickened parts of the lines) has been obtained experimentally and corresponding lines have been linearly extrapolated. The values for  $\ln k_{D\,m0g}^{\#}$  are taken at  $1/T_{amb}$  (cf. Table 3).

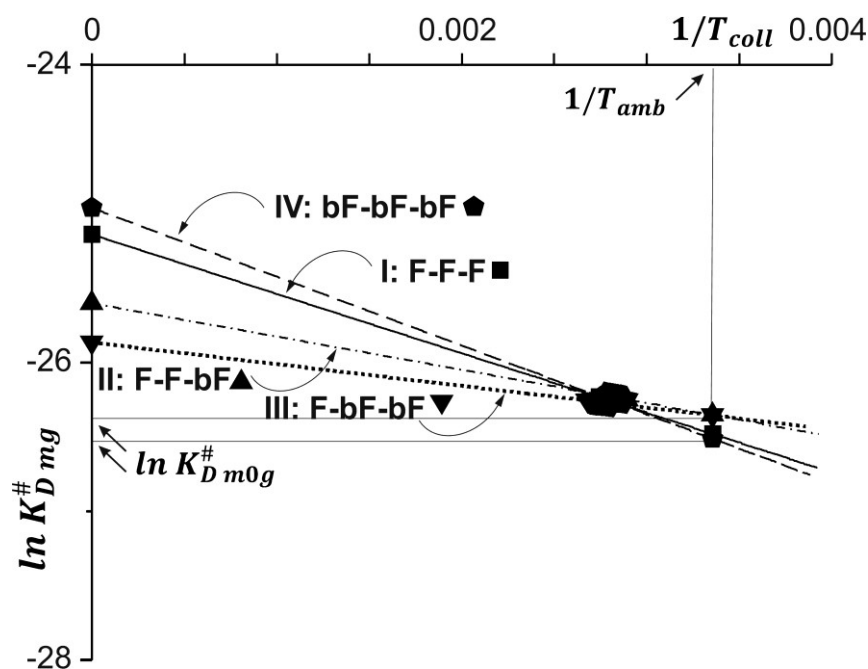

**Supplemental Figure S8:** Gibbs-Helmholtz plot for (biotinylated) T4Ff trimer dissociation reactions in the gas phase. T4Ff homo-trimer: ■; singly biotinylated T4Ff hetero-trimer: ▲; doubly biotinylated T4Ff hetero-trimer: ▼; biotinylated T4Ff homo-trimer: ◆. Each data point (thickened parts of the lines) has been obtained experimentally and corresponding lines have been linearly extrapolated. The values for  $\ln k_{D\,m0g}^{\#}$  are taken at  $1/T_{amb}$  (cf. Table 3).

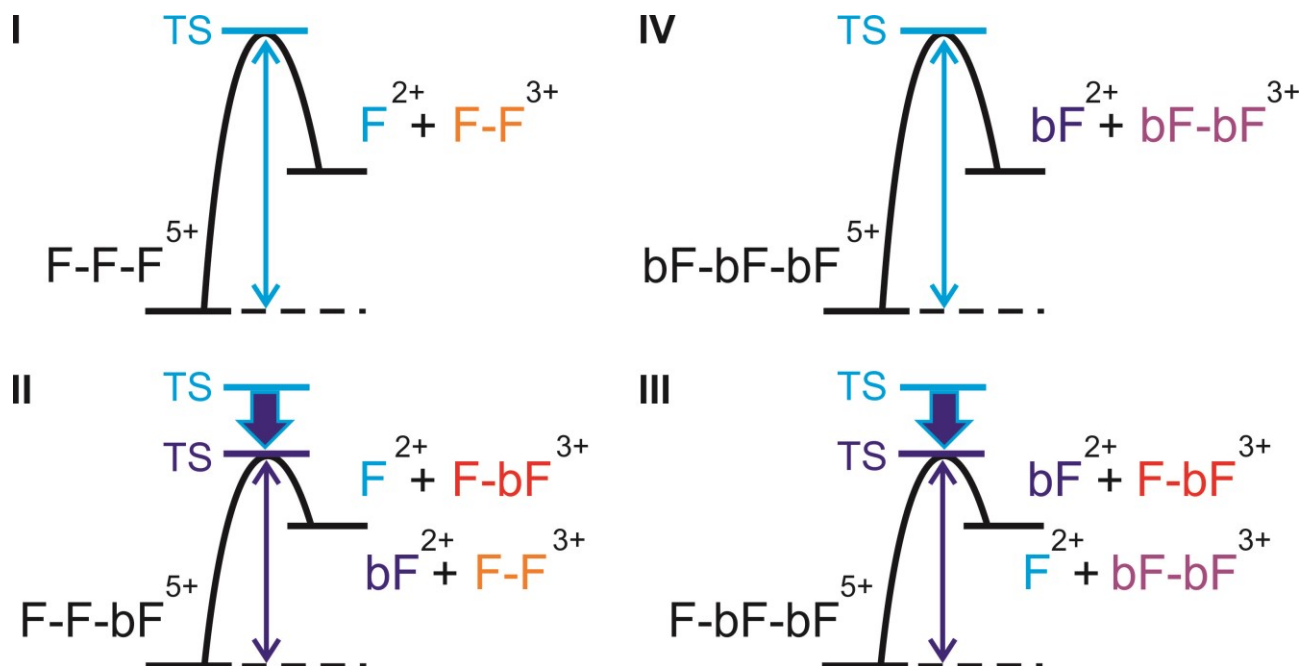

**Supplemental Figure S9:** Energy diagrams showing the apparent enthalpies of activation required by multiply charged and accelerated (biotinylated) T4Ff trimers ( $\Delta H_{m0g}^{\#}$ ) to reach the transition state (TS) before dissociating into products ions. **I:** T4Ff homo-trimer (F-F-F). **II:** singly biotinylated T4Ff hetero-trimer (F-F-bF). **III:** doubly biotinylated T4Ff hetero-trimer (F-bF-bF). **IV:** biotinylated T4Ff homo-trimer (bF-bF-bF). The dark blue arrow indicates lowering of the energy level of the transition states of the hetero-trimers with respect to those of the homo-trimers.
